when  $O_2$  breathing is begun and reverse promptly on return to a normal inspired  $O_2$  tension. Among the "pathologic" effects are: enzymatic derangements, visual-cell death, retinal detachment, cytoid-body microinfarct formation and retrolental fibroplasia. These effects are considered to be secondary to the effect of true enzymatic oxygen poisoning and/or to consequences of toxic effects upon chemical systems, physiologic mechanisms or anatomic structures that persist or appear even after removal from exposure to high  $O_2$  tension. The fact that, with the exception of retrolental fibroplasia,  $O_2$  effects on the eye that are truly irreversible have been described in animals only emphasizes the need for further careful studies in man. (Nichols, C. W., and Lambertsen, C. J.: *Effects of High Oxygen Pressures on the Eye*, *New Engl. J. Med.* 281: 25 (July) 1969.)

**AIRWAY RESISTANCE** Esophageal pressure and respiratory flow rates were studied and correlated with respiratory volume in healthy young volunteers in the sitting position. Total viscous resistance of the lung was calculated from pressure-volume diagrams by correlating respiratory flow rates and esophageal pressure changes throughout the entire respiratory cycle in 50-ml volume increments. During inspiration there was a continuous decrease of resistance of about 20 per cent when the inspired volume increased from zero to 600 ml. During transition from inspiration to expiration, a significant abrupt increase in resistance of about 50 per cent (from 1.15 to 1.71 cm  $H_2O/100$  ml) was noted. During expiration resistance increased to a maximum of 1.87 cm  $H_2O/100$  ml, then decreased toward the initial level of 1.45 cm  $H_2O/100$  ml at the end of expiration. The directional change of the transmural pressure and the effect of the elastic pull on the bronchial and bronchiolar diameters are considered the main factors contributing to changes in total viscous resistance. (Berger, W.: *Total Viscous Resistance of the Lung during the Respiratory Cycle*, *Zschr. Ges. Exp. Med.* 150: 41 (May) 1969.)

**LUNG STRETCH RECEPTORS** Responses of the heart, total peripheral vascular

resistance, and the resistance of the innervated hindlimb perfused at a constant rate were investigated during positive-pressure inflation of the lungs. An inflation pressure of 20 mm Hg produced significant negative inotropic and chronotropic effects. Heart rate, intracardiac pressure and contractile force, measured with a Walton-Brodie strain gauge arch, all decreased. Peripheral vascular resistance decreased by an average of approximately 22 per cent and perfusion pressure in the isolated hindlimb by 26 per cent. Bilateral cervical vagotomy abolished the reflex cardiovascular responses to inflation of the lung. Lung receptors are sensitive to stretch, and the afferent pathway runs predominantly in the vagus nerves. (Glick, G., Wechsler, A. S., and Epstein, S. E.: *Reflex Cardiovascular Depression Produced by Stimulation of Pulmonary Stretch Receptors in the Dog*, *J. Clin. Invest.* 48: 467 (March) 1969.)

**COLLATERAL CHANNELS IN HUMAN LUNGS** The resistance of collateral channels in interlobar fissures was measured in eight normal and eight emphysematous excised human lungs. Similar measurements were made in other areas of normal and emphysematous lungs. Excised segments were inflated through a bronchial cannula while air leaked through collateral channels out of the other lobe or segment through a pneumotachograph measuring flow. Alveolar pressure difference producing collateral flow was also measured. By measuring inflating pressure and airway pressure at the pneumotachograph, lobar airway resistance could be calculated. In normal lungs, collateral channel resistance varied inversely with lung volume and was higher on inflation than on deflation. Airway resistance was small compared with collateral channel resistance. In emphysematous lungs, collateral channel resistance was considerably lower, and was less than airway resistance. Collateral channels are important ventilatory pathways in emphysema. When many units within a lung are ventilated by such pathways, disturbances of gas exchange and phase differences between normally- and abnormally-ventilated areas may occur. (Hogg, J. C., MacKlem, P. T., and Thurlbeck, W. M.: *The Resistance of Collateral Channels in Excised Hu-*
